# Supplementary material
Source: ML conference proceedings conference paper supplement (https://openreview.net/forum?id=SAT0KPA5UO)
Supplement: supplementary_material [file c2db-confusion_matrices.pdf › mlip-arena-0.1.1/benchmarks/c2db/c2db-confusion_matrices.pdf]

MACE-MP(M)

|      |          |           |     |   |
|------|----------|-----------|-----|---|
| True | stable   | 43        | 244 | 0 |
|      | unstable | 21        | 196 | 1 |
|      | missing  | 0         | 0   | 0 |
|      |          | Predicted |     |   |

CHGNet

|      |          |           |     |   |
|------|----------|-----------|-----|---|
| True | stable   | 0         | 287 | 0 |
|      | unstable | 0         | 218 | 0 |
|      | missing  | 0         | 0   | 0 |
|      |          | Predicted |     |   |

M3GNet

|      |          |           |     |   |
|------|----------|-----------|-----|---|
| True | stable   | 9         | 275 | 3 |
|      | unstable | 6         | 209 | 3 |
|      | missing  | 0         | 0   | 0 |
|      |          | Predicted |     |   |

MatterSim

|      |          |           |     |   |
|------|----------|-----------|-----|---|
| True | stable   | 37        | 249 | 1 |
|      | unstable | 15        | 202 | 1 |
|      | missing  | 0         | 0   | 0 |
|      |          | Predicted |     |   |

ORBv2

|      |          |           |     |   |
|------|----------|-----------|-----|---|
| True | stable   | 0         | 287 | 0 |
|      | unstable | 0         | 215 | 3 |
|      | missing  | 0         | 0   | 0 |
|      |          | Predicted |     |   |

SevenNet

|      |          |           |     |   |
|------|----------|-----------|-----|---|
| True | stable   | 27        | 260 | 0 |
|      | unstable | 12        | 205 | 1 |
|      | missing  | 0         | 0   | 0 |
|      |          | Predicted |     |   |

MACE-MPA

|      |          |           |     |   |
|------|----------|-----------|-----|---|
| True | stable   | 39        | 248 | 0 |
|      | unstable | 19        | 199 | 0 |
|      | missing  | 0         | 0   | 0 |
|      |          | Predicted |     |   |

ALIGNN

|      |          |           |     |    |
|------|----------|-----------|-----|----|
| True | stable   | 0         | 277 | 10 |
|      | unstable | 0         | 205 | 13 |
|      | missing  | 0         | 0   | 0  |
|      |          | Predicted |     |    |
