# Supplementary material
Source: ML conference proceedings conference paper supplement (https://openreview.net/forum?id=SAT0KPA5UO)

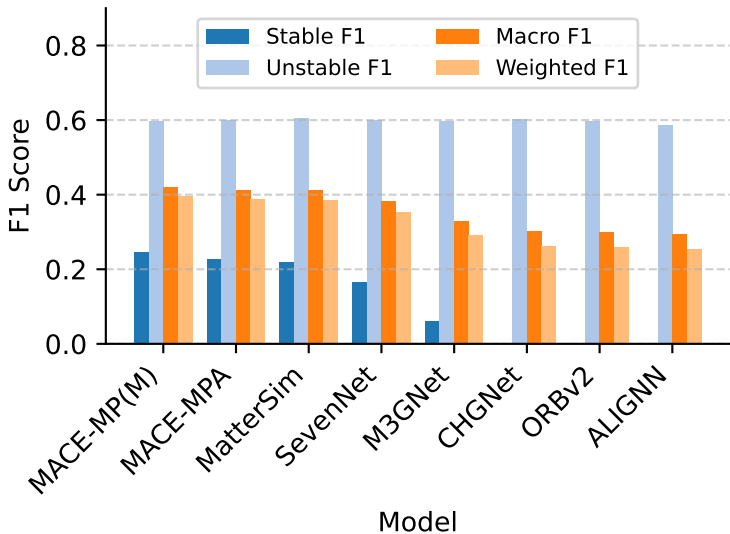

Supplement: supplementary_material [file c2db-f1_bar.pdf › mlip-arena-0.1.1/benchmarks/c2db/c2db-f1_bar.pdf]

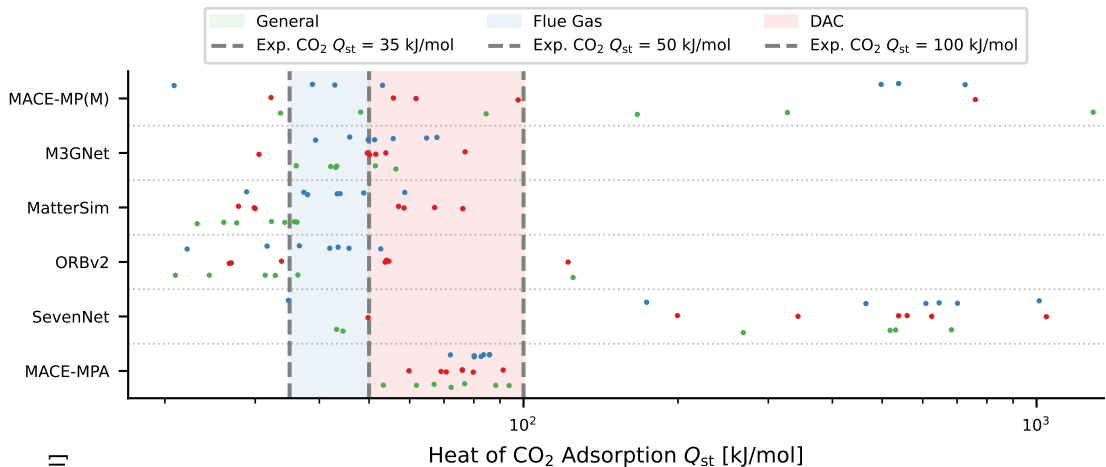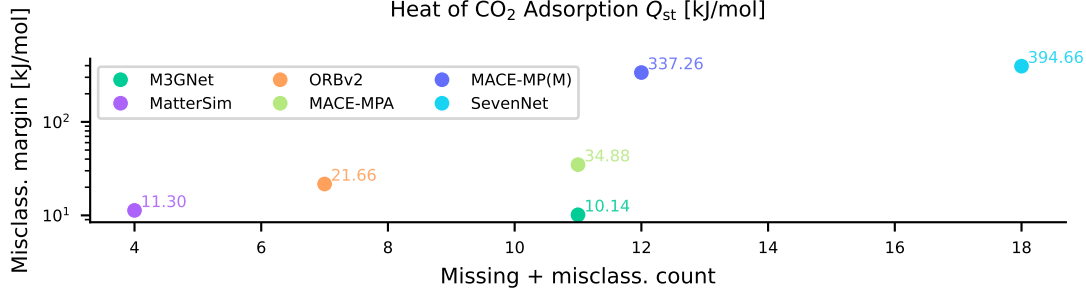

Supplement: supplementary_material [file mof-misclassification_margin.pdf › mlip-arena-0.1.1/benchmarks/mof/classification/mof-misclassification_margin.pdf]
